# Supplementary material
Source: PubMed Central journal article supplement (PMC5514394)
Supplement: ac7b01149_si_001.pdf [file ac7b01149_si_001.pdf]

## Supporting Information

### Dual Recognition Element Lateral Flow Assay (DRELFA)- Towards Multiplex Strain Specific Influenza Virus Detection

Thao T. Le,<sup>a</sup> Pengxiang Chang<sup>b</sup>, Donald J. Benton<sup>c</sup>, John W. McCauley<sup>c</sup>, Munir Iqbal<sup>b</sup>, and Anthony E.G. Cass<sup>\*a</sup>

#### Aptamer sequences

Sequences of the RNA aptamers and corresponding DNA templates used

**SI Table:** Oligonucleotide sequences

| Name           | Role                                                                      | Sequence                                                                                                                                     |
|----------------|---------------------------------------------------------------------------|----------------------------------------------------------------------------------------------------------------------------------------------|
| RNAH3P07Apt    | RNA aptamer for A/Panama/99/2007 (H3N2)                                   | GGGAGAAUCCGACCAGAAGGGUUAGCAGUCGGCAUCGGUAC<br>AGACAGACCUUCCUCUCUCCUCCUCCUUCU                                                                  |
| ApH3P07        | DNA template for the RNA aptamer selected against A/Panama/99/2007 (H3N2) | TCTAATACGACTCACTATAGGGAGAATTCGACCAGAAGGGTTAG<br>CAGTCGGCATGCGGTACAGACAGACCTTCTCTCTCTCTCTCTC<br>T                                             |
| ForH3P07       | Forward primer for ApH3P07                                                | TCTAATACGACTCACTATAGGGAGAATTCGACCAGAAG                                                                                                       |
| RevH3P07       | Reverse primer for ApH3P07                                                | AGAAGAGGAAGGAGAGAGGAAAGG                                                                                                                     |
| ApH3P07Linker  | Linker with a biotin for the RNA aptamer against A/Panama/99/2007 (H3N2)  | 5'-biotin-TEG-AGAAGAGGAAGGAGAGAGG                                                                                                            |
| RNAH5VN04Apt   | RNA aptamer for Vietnam/1203/2004 (H5N1)                                  | GGAGCUCAGCCUUCACUGCGAGAUUGUUCUGACCGAGUUGCCU<br>AGCAGGGCAACCGCUGGAACUJUGAAGUCGGUAAUGCGAGCGGA<br>AAGCCUUGGCACCACGGUCGGAUCCAC                   |
| ApH5VN04       | DNA template for the RNA aptamer                                          | TCTAATACGACTCACTATAGGAGCTCAGCCTTCACTGCGAGATTGT<br>TCTGACCGAGTTGCCTAGCAGGGCAACCGCTGGAACCTGAAGTCG<br>GTAATGCGAGCGGAAAGCCTTGGA CCACGGTCCGATCCAC |
| ForH5VN04      | Forward primer for ApH5VN04                                               | TCTAATACGACTCACTATAGGAGCTCAGCCTTCACTGCG                                                                                                      |
| RevH5VN04      | Reverse primer for ApH5VN04                                               | GTGGATCCGACCGTGGTGCC                                                                                                                         |
| ApH3VN04Linker | Linker with a biotin for the RNA aptamer against                          | 5' Biotin-TEG-GTGGATCCGACCGTGGTGCC                                                                                                           |
| DNAH9N2Apt     | DNA aptamer against purified hemagglutinin H9 protein <sup>1</sup>        | 5' Biotin-TEG-<br>GCTGCAATACTCATGGACAGGGGCCGCGCCTGGTGGTTGGGTGG<br>GTGGCGCCCGGACGGTCTGGAGTACGACCTGAA                                          |

#### Additional Data

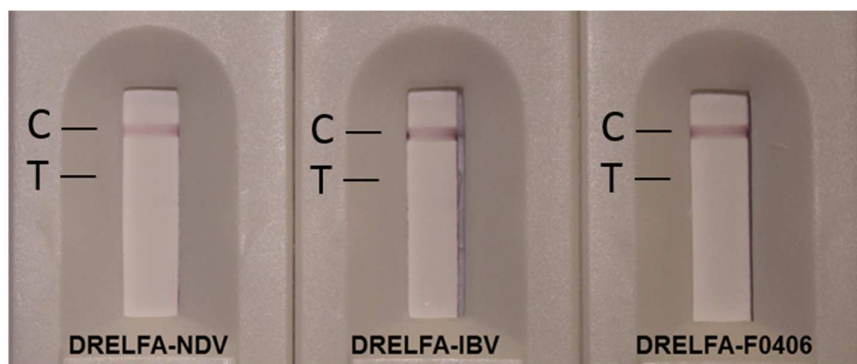

**SI1 Figure:** Cross-reactivity test of the DRELFA format with 3 viruses (Newcastle disease virus (NDV), infectious bronchitis virus (IBV) and an influenza B virus, B/Florida/04/2006 (F0406) at a concentration of  $3 \times 10^8$  virus particles per sample. All three viruses showed only the control line (C) with no visual detectable signal on the test line (T). The measurements were performed on a DRELFA comprising a reported RNA aptamer selected against an influenza A virus strain A/Panama/2007/99 (H3N2) and an anti-hemagglutinin H3 antibody.

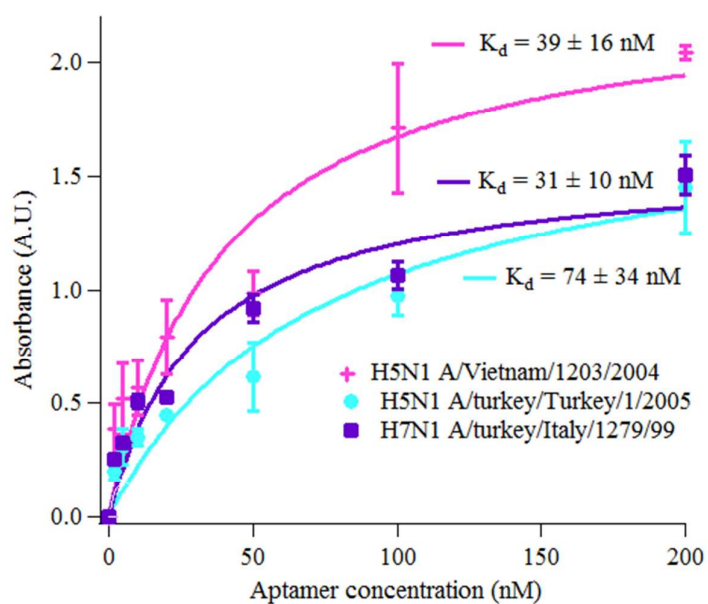

**SI2 Figure:** Binding of a reported RNA aptamer selected against the influenza A strain A/Vietnam/1203/2004 (H5N1) to whole virus particles of 3 different viruses: Vietnam/1203/2004 (H5N1); A/turkey/Turkey/1/2005 (H5N1) and A/turkey/Italy/1279/99 (H7N1). Binding data were obtained using Enzyme Linked Oligo Nucleotide Assays (ELONAs).

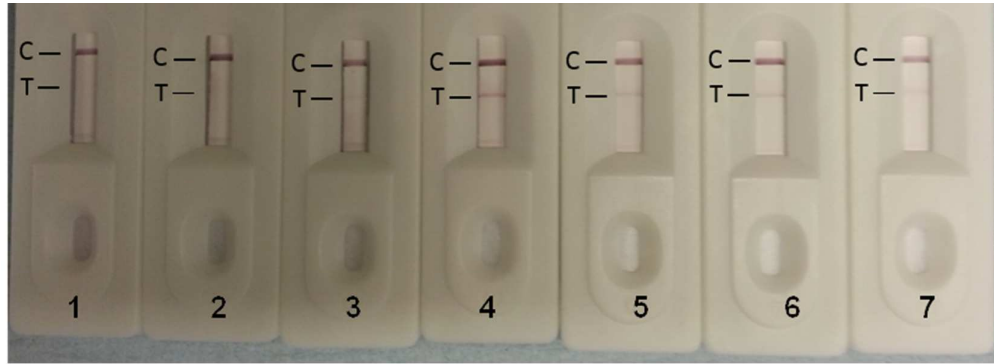

**SI3 Figure 1:** H5N1-aptamer DRELFAs on different virus samples (1: A/Panama/2007/99 (H3N2); 2: A/Udorn/307/72 (H3N2); 3: A/Aichi/2/68 (H3N2); 4: A/Vietnam/1203/2004 (H5N1); 5: A/turkey/Turkey/1/2005 (H5N1); 6: A/turkey/Italy/1279/99 (H7N1); 7: A/chicken/Pakistan/UDL/2008 (H9N2)). All viruses used in this study were inactivated vaccine strains and were generated using reverse genetic technique carrying HA and NA gene of indicated strains and internal genes from a laboratory strain of A/Puerto Rico/8/1934 (H1N1) virus. The HA genes of high pathogenicity H5N1 viruses also lack polybasic cleavage site. The DRELFA format comprised a reported RNA aptamer selected against influenza A virus strain A/Vietnam/1203/2004 (H5N1) with the respective hemagglutinins monoclonal antibodies; anti-hemagglutinin H3, anti-hemagglutinin H5, anti-hemagglutinin H7 or anti-hemagglutinin H9. All samples contained  $10^8$  virus particles as measured by nanoparticle tracking analysis

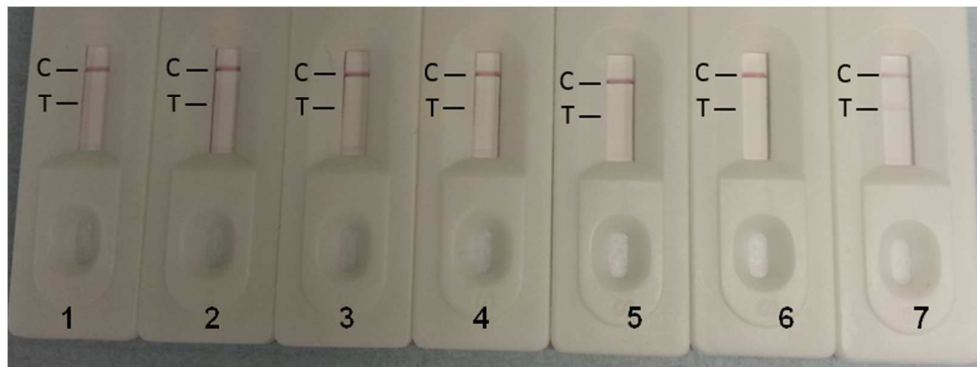

**SI3 Figure 2:** H9N2-aptamer DRELFAs on virus samples (1: A/Panama/2007/99 (H3N2); 2: A/Udorn/307/72 (H3N2); 3: A/Aichi/2/68 (H3N2); 4: A/turkey/Turkey/1/2005 (H5N1); 5: A/turkey/Italy/1279/99 (H7N1); 6: A/Vietnam/1203/2004 (H5N1); 7: A/chicken/Pakistan/UDL/2008 (H9N2)). The DRELFA format comprised a DNA aptamer selected against influenza A virus strain A/chicken/Pakistan/UDL/2008 (H9N2) with the respective anti hemagglutinin (H3, H5, H7 or H9) antibodies. All samples contained  $10^8$  virus particles.

## References

- (1) Zhang, Y., Yu, Z., Jiang, F., Fu, P., Shen, J., Wu, W. and Li, J., *PLoS ONE*, **2015**, 10, e0123060.
